# Supplementary material
Source: Springer Nature journal article supplement (https://www.springermedizin.de/resource/supplementary/12913_2013_3740_MOESM4_ESM.pdf/9532248)
Supplement: MOESM4 [file 9532248]

(0 tests)

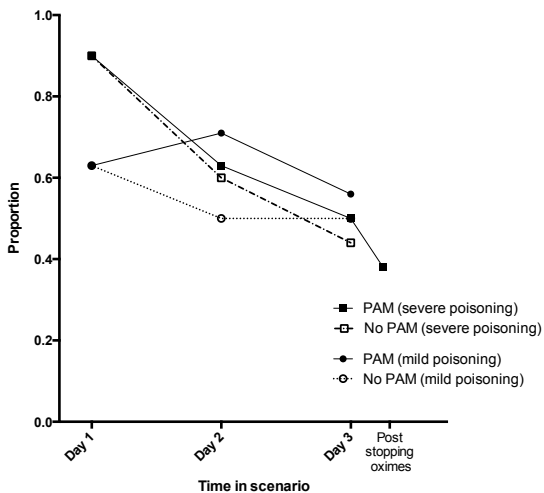

a)

(1-5 tests)

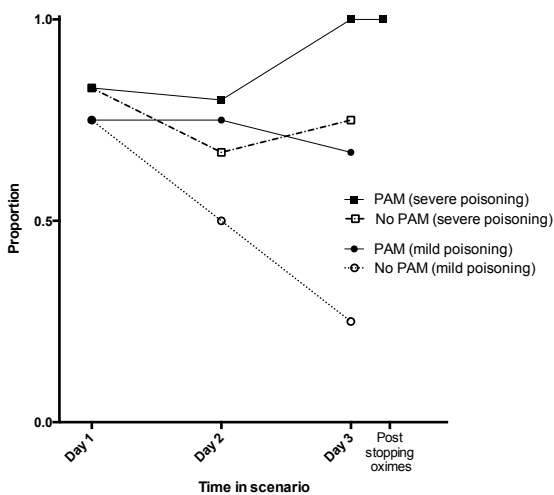

b)

(5-20 tests)

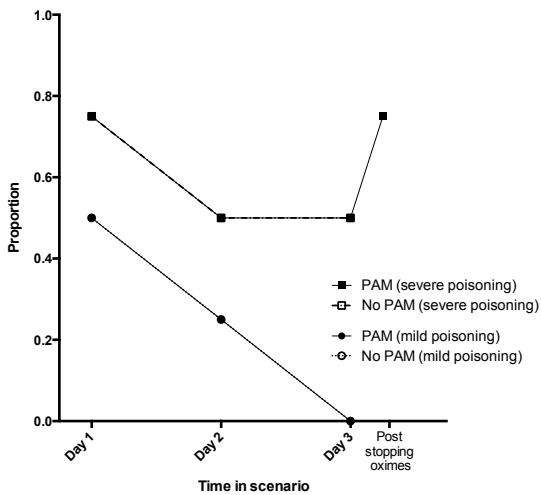

c)
